# Supplementary material for: An Exploration of Rhythmic Grouping of Speech Sequences by French- and German-Learning Infants
Source: PubMed Central journal article supplement (PMC4906042; doi:10.3389/fnhum.2016.00292), 2016-06-14
Supplement: Image_1.pdf [file Image_1.pdf]

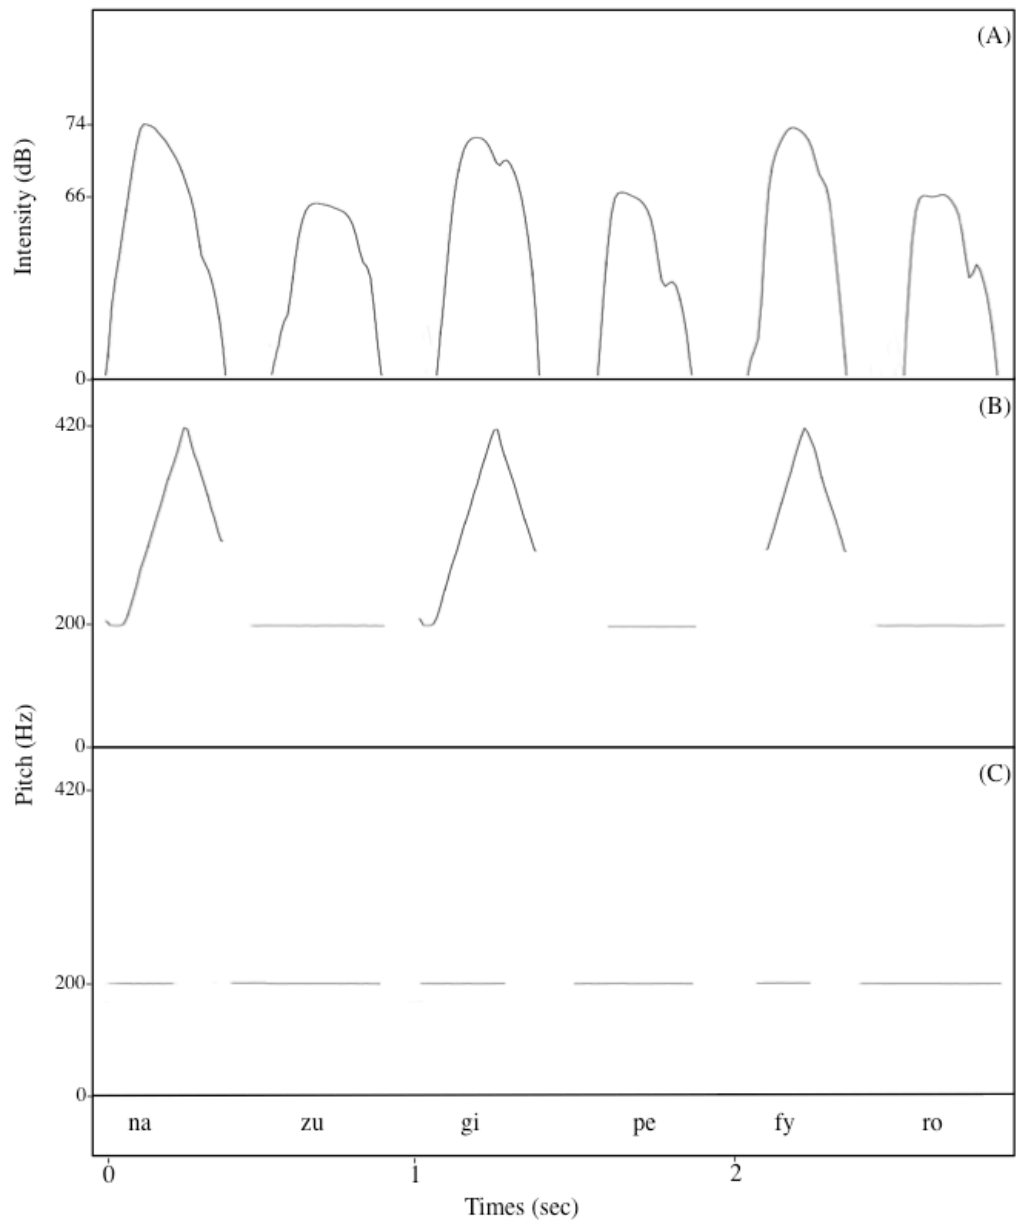

Figure S1: Segment from the middle of the familiarization stream with the three test conditions : (A): Intensity condition, (B): Pitch condition, (C): Duration condition.
